# Supplementary material for: The RNA-binding Motif Protein 15B (RBM15B/OTT3) Acts as Cofactor of the Nuclear Export Receptor NXF1
Source: PubMed Central journal article supplement — J Biol Chem. 2009 Jul 8;284(38):26106–16. doi: 10.1074/jbc.M109.040113 (PMC2758010; doi:10.1074/jbc.m109.040113), 2009-07-08
Supplement: supp_M109.040113_jbc.M109.040113-1.pdf [file supp_M109.040113_jbc.M109.040113-1.pdf]

## Supplemental Figure Legend

Figure 1. *A*, Embryos at E11.5 were analyzed on mRNA microarrays, leading to high confidence detection of 33167 transcripts. Values corresponding to RefSeq-annotated transcripts (n=14619, for complete datasets see <http://www.ncbi.nlm.nih.gov/geo/query/acc.cgi?acc=GSE11785>) are presented. Plotted on the X-axis (*Relative abundance*) are the log levels of each transcript (raw intensity units), averaged over WT and HE embryos (n=5). Plotted on the Y-axis (*Response to RBM15 depletion*) are log intensity ratios that represent, for each transcript, its level found in a typical HO embryo, divided by its *Relative abundance* value. Data were subjected to pruning, so that each symbol on the plot represents 20 transcripts. *Down* and *Up*, the down and upregulated transcripts in HO embryo. *Low* and *High*, the low and high abundance transcripts, arbitrarily defined. *B*, For each low abundance transcript, its average level obtained in HE (n=3) or HO (n=3) embryos was normalized to that in WT (n=2) and plotted on the Y-axis (*Response to RBM15 depletion*). These values are significantly different in HE and HO animals (n=15184, P=0.0001,  $\alpha=0.05$ , Mann-Whitney test). Similar results were obtained when studying the *RBM15*<sup>XK135</sup> allele in mice with different genetic backgrounds (not shown). *C*, The top transcript categories, according to *Molecular Function* (PANTHER classification system, <http://www.pantherdb.org>) that are nonrandomly represented ( $\alpha=0.05$ , Mann-Whitney test) in HO as compared to HE embryos. For each RefSeq-annotated transcript (n=14619), we divided its average level in HO embryos (n=3) by that in HE (n=3), and analyzed these ratios using the PANTHER expression tools online.

# Supplementary Figure 1

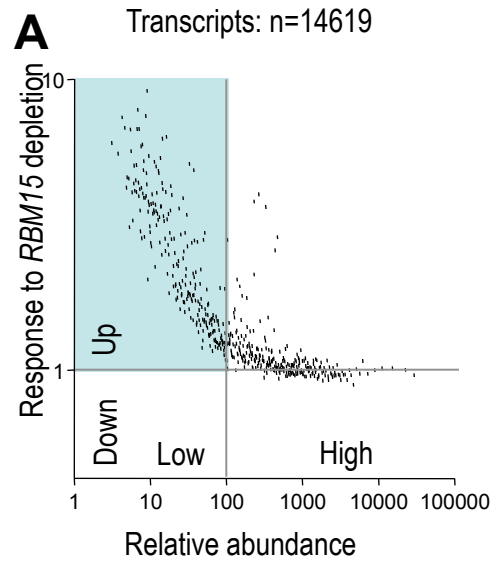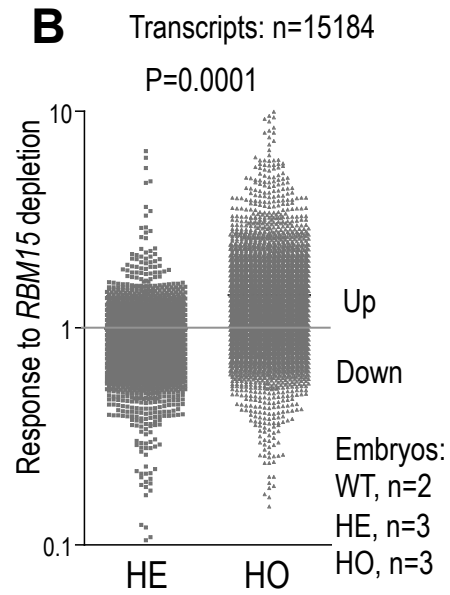

**C**

| Molecular Function         | number | P-value  | Regulation |
|----------------------------|--------|----------|------------|
| G-protein coupled receptor | 589    | 2.00E-12 | up         |
| Nucleic acid binding       | 1682   | 7.60E-11 | down       |
| Ribonucleoprotein          | 57     | 6.38E-08 | down       |
| Ribosomal protein          | 142    | 7.88E-08 | down       |
| mRNA splicing factor       | 69     | 2.53E-06 | down       |
| mRNA processing factor     | 96     | 1.63E-05 | down       |
